# Supplementary material for: Particulate matter exposure may increase the risk of irritable bowel syndrome: a large-scale prospective study based on the UK Biobank
Source: Royal Society of Chemistry journal article supplement (doi:10.1039/d3en00650f), 2023-12-21
Supplement: d3en00650f1.pdf [file d3en00650f1.pdf]

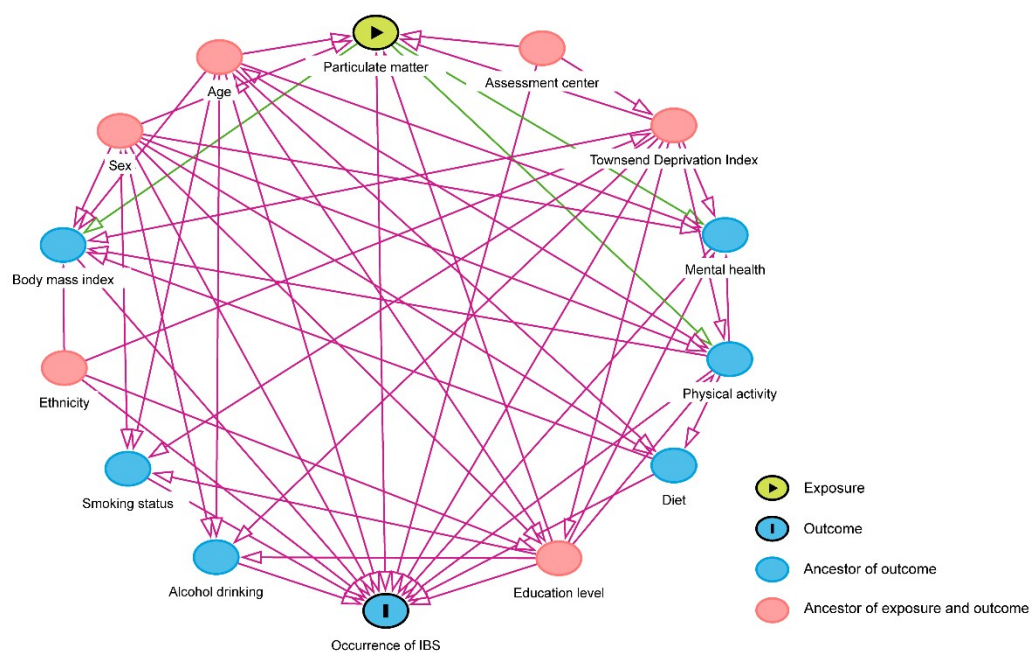

**Figure S1 Directed acyclic graph for the associations between particulate matter exposure and IBS.**

Abbreviation: IBS, irritable bowel syndrome.

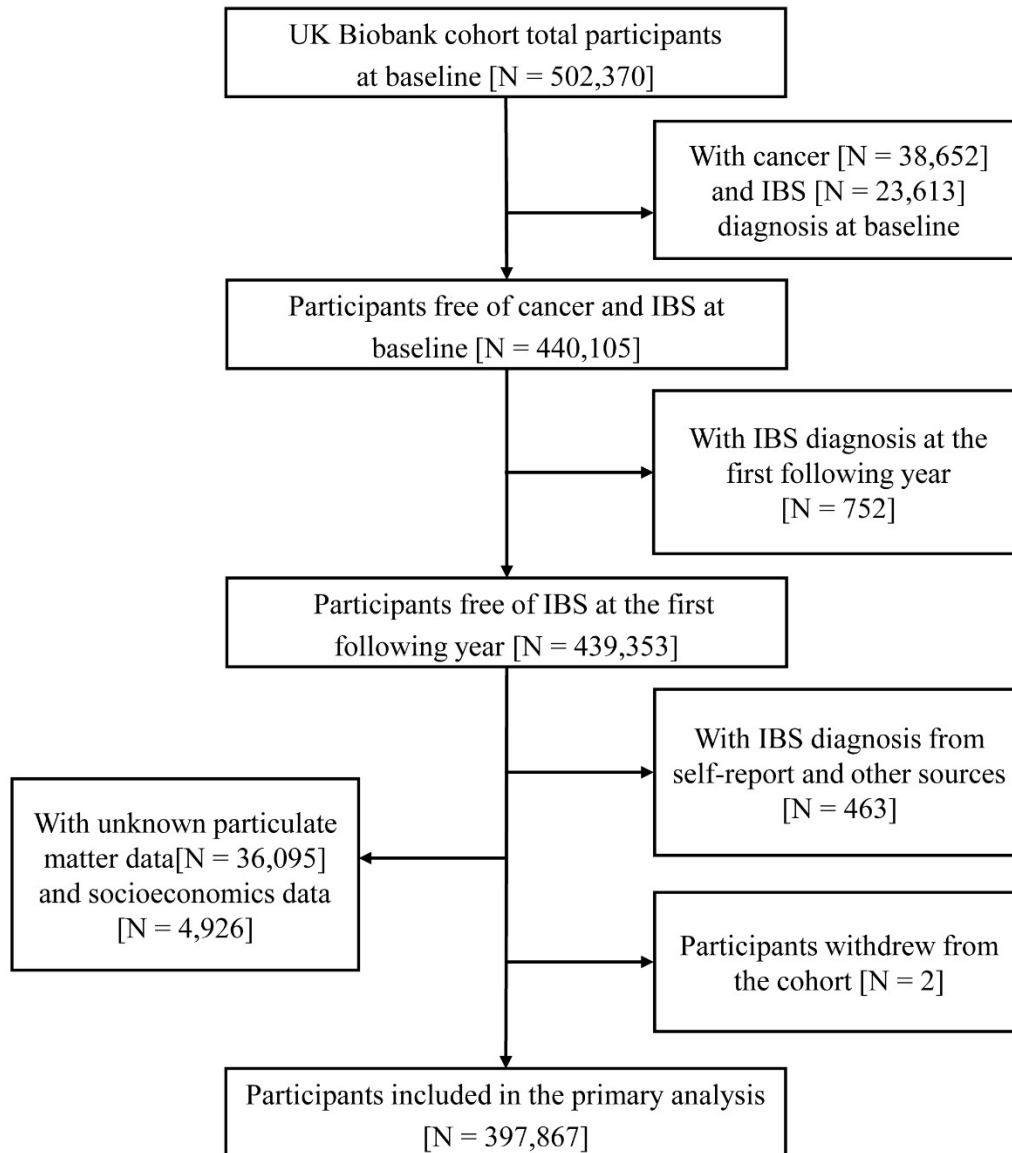

**Figure S2 The flowchart of participants included in this study.**

Abbreviation: IBS, irritable bowel syndrome.

**Table S1 The Pearson correlation results among the size-specific ambient particulate matter**

|                      | PM <sub>10</sub> | PM <sub>2.5-10</sub> | PM <sub>2.5</sub> |
|----------------------|------------------|----------------------|-------------------|
| PM <sub>10</sub>     | 1.00             | 0.57                 | 0.56              |
| PM <sub>2.5-10</sub> | 0.57             | 1.00                 | 0.62              |
| PM <sub>2.5</sub>    | 0.56             | 0.62                 | 1.00              |

Abbreviation: PM<sub>10</sub>, inhalable particulate matter; PM<sub>2.5-10</sub>, coarse particulate matter; PM<sub>2.5</sub>, fine particulate matter.

**Table S2 The sensitivity analyses result of the associations between particulate matter exposure and IBS occurrence.**

|                        | PM <sub>2.5</sub> | PM <sub>10</sub>  |
|------------------------|-------------------|-------------------|
| Main model             | 1.33 (1.04, 1.68) | 1.14 (1.01, 1.29) |
| Sensitivity analysis 1 | 1.37 (1.05, 1.80) | 1.15 (1.00, 1.33) |
| Sensitivity analysis 2 | 1.32 (1.03, 1.69) | 1.15 (1.01, 1.31) |
| Sensitivity analysis 3 | 1.30 (1.01, 1.69) | 1.15 (1.00, 1.31) |

Main model: adjusted for age, sex, ethnicity, education level, Townsend Deprivation Index and assessment center.

Sensitivity analysis 1: on the basis of the main model, add other covariates (including body mass index, smoking status, alcohol drinking, diet, physical activity and mental disorders).

Sensitivity analysis 2: exclude the participants who diagnosed IBS within 2 years from baseline.

Sensitivity analysis 3: exclude the participants who diagnosed IBS within 3 years from baseline.

Abbreviation: IBS, irritable bowel syndrome. PM<sub>10</sub>, inhalable particulate matter; PM<sub>2.5</sub>, fine particulate matter.

**Table S3 Associations between long-term PM<sub>2.5</sub> and PM<sub>10</sub> exposure and IBS occurrence.**

| Particulate matter | Annual average of concentration (µg/m <sup>3</sup> ) | HRs (95%CI)       | <i>P</i> value | <i>P</i> for trend |
|--------------------|------------------------------------------------------|-------------------|----------------|--------------------|
| PM <sub>2.5</sub>  |                                                      |                   |                | 0.04               |
| Q1                 | 8.17 – 9.29                                          | Reference         | -              |                    |
| Q2                 | 9.29 – 9.93                                          | 1.09 (1.02, 1.16) | 0.01           |                    |
| Q3                 | 9.93 – 10.57                                         | 1.09 (1.02, 1.16) | 0.01           |                    |
| Q4                 | 10.57 – 21.31                                        | 1.07 (1.00, 1.15) | 0.07           |                    |
| PM <sub>10</sub>   |                                                      |                   |                | 0.04               |
| Q1                 | 11.78 – 15.25                                        | Reference         | -              |                    |
| Q2                 | 15.25 – 16.03                                        | 1.08 (1.02, 1.16) | 0.01           |                    |
| Q3                 | 16.03 – 17.01                                        | 1.03 (0.97, 1.10) | 0.33           |                    |
| Q4                 | 17.01 – 31.39                                        | 1.08 (1.01, 1.16) | 0.02           |                    |

Notes: Model was adjusted for age, sex, ethnicity, education level, Townsend Deprivation Index and assessment center.

Abbreviation: IBS, irritable bowel syndrome; PM<sub>10</sub>, inhalable particulate matter; PM<sub>2.5</sub>, fine particulate matter; HRs, hazards ratios; Q1, first percentile; Q2, second percentile; Q3, third percentile; Q4, fourth percentile.

**Table S4 The stratified analysis for the associations between PM<sub>2.5</sub> and PM<sub>10</sub> exposure and IBS occurrence.**

| Strata                                  | PM <sub>2.5</sub> |                         | PM <sub>10</sub>  |                         |
|-----------------------------------------|-------------------|-------------------------|-------------------|-------------------------|
|                                         | HRs (95%CI)       | <i>P</i> for difference | HRs (95%CI)       | <i>P</i> for difference |
| Main model                              | 1.33 (1.04, 1.68) |                         | 1.14 (1.01, 1.29) |                         |
| Sex                                     |                   |                         |                   |                         |
| Male                                    | 1.13 (0.73, 1.75) | Reference               | 0.99 (0.79, 1.25) | Reference               |
| Female                                  | 1.42 (1.07, 1.89) | 0.28                    | 1.21 (1.04, 1.40) | 0.12                    |
| Age (years)                             |                   |                         |                   |                         |
| < 60                                    | 1.33 (0.99, 1.78) | 0.89                    | 1.24 (1.06, 1.45) | 0.05                    |
| ≥ 60                                    | 1.29 (0.86, 1.93) | Reference               | 0.99 (0.80, 1.21) | Reference               |
| Body mass index (kg/m <sup>2</sup> )    |                   |                         |                   |                         |
| < 25                                    | 1.52 (1.00, 2.31) | 0.22                    | 1.18 (0.95, 1.46) | 0.55                    |
| ≥ 25                                    | 1.20 (0.90, 1.61) | Reference               | 1.10 (0.94, 1.28) | Reference               |
| Education level                         |                   |                         |                   |                         |
| Low                                     | 0.83 (0.49, 1.4)  | Reference               | 1.15 (0.88, 1.51) | 0.77                    |
| High                                    | 1.45 (1.10, 1.89) | 0.04                    | 1.10 (0.96, 1.27) | Reference               |
| Townsend Deprivation Index <sup>1</sup> |                   |                         |                   |                         |
| Low economic level                      | 1.33 (0.98, 1.8)  | 0.88                    | 1.22 (1.02, 1.45) | 0.28                    |
| High economic level                     | 1.29 (0.87, 1.91) | Reference               | 1.08 (0.91, 1.28) | Reference               |
| Smoking status                          |                   |                         |                   |                         |
| Never smoking                           | 1.26 (0.9, 1.77)  | Reference               | 1.10 (0.93, 1.30) | Reference               |
| Previous/current smoking                | 1.28 (0.91, 1.81) | 0.95                    | 1.14 (0.95, 1.37) | 0.74                    |

Notes: Model was adjusted for age, sex, ethnicity, education level, Townsend Deprivation Index and assessment center.

<sup>1</sup>, High economic level was defined as Townsend Deprivation Index < -2.17 (median value) while low economic level was defined as Townsend Deprivation Index  $\geq$  -2.17.

Abbreviation: HRs, hazards ratios; PM<sub>10</sub>, inhalable particulate matter; PM<sub>2.5</sub>, fine particulate matter; IBS, irritable bowel syndrome.

**Table S5 The results of the associations between particulate matter exposure and incidence risks of traffic accidents (negative outcome control).**

|                      | HRs (95%CI)       | <i>P</i> value |
|----------------------|-------------------|----------------|
| Particulate matter   |                   |                |
| PM <sub>2.5</sub>    | 0.83 (0.61, 1.14) | 0.25           |
| PM <sub>2.5-10</sub> | 0.78 (0.56, 1.09) | 0.14           |
| PM <sub>10</sub>     | 0.87 (0.74, 1.02) | 0.08           |

Notes: Transport accidents (ICD-10: V01 – V99) was chosen as the negative outcome control and the model was adjusted for age, sex, ethnicity, education level, Townsend Deprivation Index and assessment center.

Abbreviation: HRs, hazards ratios; PM<sub>10</sub>, inhalable particulate matter; PM<sub>2.5-10</sub>, coarse particulate matter; PM<sub>2.5</sub>, fine particulate matter.
